# Supplementary material for: The association of six polymorphisms of five genes involved in three steps of nucleotide excision repair pathways with hepatocellular cancer risk
Source: PubMed Central journal article supplement (PMC4991460; doi:10.18632/oncotarget.7952), 2016-03-07
Supplement: oncotarget-07-20357-s001.pdf [file oncotarget-07-20357-s001.pdf]

**Supplementary Table S1: The baseline of the subjects**

| Variables             | Hepatocellular<br>cancer patients (%) | Controls (%)   | <i>P</i> | Hepatocellular<br>cancer patients (%) | Controls (%)   | <i>P</i> |
|-----------------------|---------------------------------------|----------------|----------|---------------------------------------|----------------|----------|
|                       | <i>n</i> = 169                        | <i>n</i> = 501 |          | <i>n</i> = 401                        | <i>n</i> = 401 |          |
| Gender                |                                       |                | 0.950    |                                       |                | 0.070    |
| Male                  | 139 (82.2)                            | 411 (82.0)     |          | 326 (81.3)                            | 305 (76.1)     |          |
| Female                | 30 (17.8)                             | 90 (18.0)      |          | 75 (18.7)                             | 96 (23.9)      |          |
| Age                   |                                       |                | 0.603    |                                       |                | 0.853    |
| Mean ± SD             | 57.5 ± 9.8                            | 57.1 ± 9.4     |          | 56.6 ± 11.2                           | 56.7 ± 10.9    |          |
| Median                | 57                                    | 57             |          | 58                                    | 57             |          |
| Range                 | 34–86                                 | 34–86          |          | 21–90                                 | 17–89          |          |
| Smoking               |                                       |                | < 0.001  |                                       |                | 0.086    |
| Never                 | 123 (78.3)                            | 168 (52.2)     |          | 265 (71.4)                            | 93 (63.7)      |          |
| Ever                  | 34 (21.7)                             | 154 (47.8)     |          | 106 (28.6)                            | 53 (36.3)      |          |
| Drinking              |                                       |                | < 0.001  |                                       |                | 0.119    |
| Never                 | 129 (82.2)                            | 204 (63.6)     |          | 309 (83.3)                            | 113 (77.4)     |          |
| Ever                  | 28 (17.8)                             | 117 (36.4)     |          | 62 (16.7)                             | 33 (22.6)      |          |
| Cancer Family History |                                       |                |          |                                       |                |          |
| Had                   | 24 (14.2)                             | ND             |          | 75 (18.7)                             | ND             |          |
| No                    | 135 (79.9)                            | ND             |          | 296 (73.8)                            | ND             |          |
| Missing Data          | 10 (5.9)                              | ND             |          | 30 (7.4)                              | ND             |          |
| HBsAg                 |                                       |                |          |                                       |                |          |
| Negative              | 36 (22.0)                             | ND             |          | 269 (78.0)                            | ND             |          |
| Positive              | 128 (78.0)                            | ND             |          | 76 (22.0)                             | ND             |          |
| Anti-HCV              |                                       |                |          |                                       |                |          |
| Negative              | 149 (91.4)                            | ND             |          | 135 (76.3)                            | ND             |          |
| Positive              | 14 (8.6)                              | ND             |          | 42 (23.7)                             | ND             |          |

ND, not known.

**Supplementary Table S2: The association of NER pathway gene SNPs and risk of hepatocellular cancer**

| Gene                       | Chr. Pos. | SNP*       | Loc.      | Genotype   | Cases (%)      | Controls (%)     | P†           | OR (95% CI)             |           |                  |
|----------------------------|-----------|------------|-----------|------------|----------------|------------------|--------------|-------------------------|-----------|------------------|
| <b>Recognition-related</b> |           |            |           |            |                |                  |              |                         |           |                  |
| XPA                        | 9q22.3    | rs10817938 | Promoter  | TT         | 105 (62.1)     | 311 (62.1)       |              |                         |           |                  |
|                            |           |            |           | TC         | 51 (30.2)      | 172 (34.3)       | 0.525        | 0.88 (0.60–1.30)        |           |                  |
|                            |           |            |           | CC         | 13 (7.7)       | 15 (3.0)         | <b>0.020</b> | <b>2.52 (1.16–5.49)</b> |           |                  |
|                            |           | rs3176629  | Promoter  | CC         | 142 (84.0)     | 407 (81.2)       |              |                         |           |                  |
|                            |           |            |           | CT         | 25 (14.8)      | 86 (17.2)        | 0.478        | 0.84 (0.52–1.36)        |           |                  |
|                            |           |            |           | TT         | 2 (1.2)        | 6 (1.2)          | 0.949        | 0.95 (0.19–4.77)        |           |                  |
|                            |           |            |           | rs3176658  | Intron 2       | CC               | 169 (100.0)  | 497 (99.2)              |           |                  |
|                            |           |            |           |            |                | rs2808668        | Intron 2     | CC                      | 43 (25.4) | 114 (22.8)       |
|                            |           |            |           |            |                | CT               | 84 (49.7)    | 265 (52.9)              | 0.434     | 0.84 (0.55–1.29) |
|                            |           |            |           |            |                | TT               | 42 (24.9)    | 116 (23.2)              | 0.895     | 0.97 (0.59–1.60) |
| XPC                        | 3p25      | rs2607775  | Promoter  | CC         | 151 (89.3)     | 465 (92.8)       |              |                         |           |                  |
|                            |           |            |           | CG         | 17 (10.1)      | 35 (7.0)         | 0.189        | 1.51 (0.82–2.77)        |           |                  |
|                            |           |            |           | GG         | 1 (0.6)        | 1 (0.2)          | 0.443        | 2.98 (0.18–48.42)       |           |                  |
|                            |           | rs1870134  | Promoter  | GG         | 88 (52.1)      | 257 (51.3)       |              |                         |           |                  |
|                            |           |            |           | GC         | 76 (45.0)      | 204 (40.7)       | 0.654        | 1.09 (0.76–1.56)        |           |                  |
|                            |           |            |           | CC         | 5 (3.0)        | 39 (7.8)         | <b>0.048</b> | <b>0.39 (0.14–0.99)</b> |           |                  |
|                            |           |            |           | rs2228000  | Exon 8         | CC               | 79 (46.7)    | 225 (44.9)              |           |                  |
|                            |           |            |           | CT         | 74 (43.8)      | 222 (44.3)       | 0.813        | 0.96 (0.66–1.38)        |           |                  |
|                            |           |            |           | TT         | 16 (9.5)       | 46 (9.2)         | 0.977        | 0.99 (0.53–1.85)        |           |                  |
|                            |           | rs2228001  | Exon 15   | AA         | 68 (40.2)      | 200 (39.9)       |              |                         |           |                  |
|                            |           |            |           | AC         | 74 (43.8)      | 234 (46.7)       | 0.733        | 0.94 (0.64–1.37)        |           |                  |
|                            |           |            |           | CC         | 27 (16.0)      | 63 (12.6)        | 0.415        | 1.25 (0.73–2.12)        |           |                  |
|                            |           | rs2470352  | 3'-UTR    | AA         | 169 (100.0)    | 497 (99.2)       |              |                         |           |                  |
|                            |           |            |           | AT         | 0 (0.0)        | 3 (0.6)          | NA           | NA                      |           |                  |
|                            |           |            |           | TT         | 0 (0.0)        | 0 (0.0)          | 0.000        | 0                       |           |                  |
| DDB2                       | 11p12     | rs2029298  | Promoter  | GG         | 64 (37.9)      | 233 (46.5)       |              |                         |           |                  |
|                            |           |            |           | GA         | 86 (50.9)      | 218 (43.5)       | 0.060        | 1.43 (0.99–2.08)        |           |                  |
|                            |           |            |           | AA         | 19 (11.2)      | 50 (10.0)        | 0.290        | 1.38 (0.76–2.51)        |           |                  |
|                            |           | rs830083   | Intron 3  | CC         | 60 (35.5)      | 188 (37.5)       |              |                         |           |                  |
|                            |           |            |           | CG         | 82 (48.5)      | 243 (48.5)       | 0.775        | 1.06 (0.72–1.55)        |           |                  |
|                            |           |            |           | GG         | 27 (16.0)      | 69 (13.8)        | 0.452        | 1.23 (0.72–2.09)        |           |                  |
|                            |           | rs3781619  | Intron 4  | AA         | 60 (35.5)      | 198 (39.5)       |              |                         |           |                  |
|                            |           |            |           | AG         | 86 (50.9)      | 238 (47.5)       | 0.359        | 1.20 (0.82–1.75)        |           |                  |
|                            |           |            |           | GG         | 23 (13.6)      | 63 (12.6)        | 0.512        | 1.21 (0.69–2.11)        |           |                  |
|                            |           |            |           | rs326222   | 3' near region | TT               | 78 (46.2)    | 245 (48.9)              |           |                  |
|                            |           | TC         | 73 (43.2) | 224 (44.7) | 0.932          | 1.02 (0.70–1.47) |              |                         |           |                  |
|                            |           | CC         | 17 (10.1) | 30 (6.0)   | 0.084          | 1.77 (0.93–3.39) |              |                         |           |                  |
| <b>Unwinding-related</b>   |           |            |           |            |                |                  |              |                         |           |                  |
| XPB(ERCC3)                 | 2q21      | rs4150441  | Intron 8  | GG         | 59 (34.9)      | 165 (32.9)       |              |                         |           |                  |
|                            |           |            |           | GA         | 80 (47.3)      | 235 (46.9)       | 0.789        | 0.95 (0.64–1.40)        |           |                  |
|                            |           |            |           | AA         | 30 (17.8)      | 97 (19.4)        | 0.564        | 0.86 (0.52–1.43)        |           |                  |
|                            |           | rs4150448  | Intron 8  | GG         | 127 (75.1)     | 405 (80.8)       |              |                         |           |                  |
|                            |           |            |           | GA         | 39 (23.1)      | 86 (17.2)        | 0.089        | 1.45 (0.95–2.23)        |           |                  |
|                            |           |            |           | AA         | 3 (1.8)        | 8 (1.6)          | 0.832        | 1.16 (0.30–4.45)        |           |                  |
|                            |           | rs4150506  | Intron 12 | CC         | 90 (53.3)      | 232 (46.3)       |              |                         |           |                  |
| CT                         | 63 (37.3) |            |           | 217 (43.3) | 0.123          | 0.75 (0.52–1.08) |              |                         |           |                  |
| TT                         | 16 (9.5)  |            |           | 48 (9.6)   | 0.617          | 0.85 (0.46–1.58) |              |                         |           |                  |
| XPB(ERCC2)                 | 19q13.3   | rs238406   | Exon 5    | GG         | 42 (24.9)      | 147 (29.3)       |              |                         |           |                  |

|                         |          |           |                                                           |    |            |            |                               |                         |
|-------------------------|----------|-----------|-----------------------------------------------------------|----|------------|------------|-------------------------------|-------------------------|
|                         |          |           |                                                           | GT | 85 (50.3)  | 253 (50.5) | 0.482                         | 1.16 (0.76–1.78)        |
|                         |          |           |                                                           | TT | 42 (24.9)  | 98 (19.6)  | 0.152                         | 1.45 (0.87–2.39)        |
|                         |          | rs50871   | Intron 12 in transcript 1; 3' near region in transcript 2 | TT | 95 (56.2)  | 204 (40.7) |                               |                         |
|                         |          |           |                                                           | TG | 62 (36.7)  | 269 (53.7) | <b>1.87 × 10<sup>-4</sup></b> | <b>0.50 (0.34–0.72)</b> |
|                         |          |           |                                                           | GG | 12 (7.1)   | 28 (5.6)   | 0.777                         | 0.90 (0.44–1.86)        |
|                         |          | rs50872   | Intron 12 in transcript 1; 3' near region in transcript 2 | CC | 110 (65.1) | 316 (63.1) |                               |                         |
|                         |          |           |                                                           | CT | 50 (29.6)  | 169 (33.7) | 0.428                         | 0.86 (0.58–1.26)        |
|                         |          |           |                                                           | TT | 9 (5.3)    | 15 (3.0)   | 0.178                         | 1.81 (0.76–4.29)        |
|                         |          | rs238417  | Intron 18                                                 | GG | 39 (23.1)  | 149 (29.7) |                               |                         |
|                         |          |           |                                                           | GC | 87 (51.5)  | 248 (49.5) | 0.191                         | 1.33 (0.87–2.05)        |
|                         |          |           |                                                           | CC | 43 (25.4)  | 90 (18.0)  | <b>0.028</b>                  | <b>1.77 (1.06–2.95)</b> |
|                         |          | rs1052555 | Exon 21                                                   | CC | 146 (86.4) | 445 (88.8) |                               |                         |
|                         |          |           |                                                           | CT | 23 (13.6)  | 54 (10.8)  | 0.326                         | 1.30 (0.77–2.19)        |
|                         |          |           |                                                           | TT | 0 (0.0)    | 2 (0.4)    | NA                            | NA                      |
|                         |          | rs13181   | 3'-UTR                                                    | TT | 138 (81.7) | 436 (87.0) |                               |                         |
|                         |          |           |                                                           | TG | 30 (17.8)  | 63 (12.6)  | 0.091                         | 1.51 (0.94–2.42)        |
|                         |          |           |                                                           | GG | 1 (0.6)    | 2 (0.4)    | 0.725                         | 1.54 (0.14–17.20)       |
| <b>Incision-related</b> |          |           |                                                           |    |            |            |                               |                         |
| ERCC1                   | 19q13.32 | rs2298881 | Promoter                                                  | CC | 79 (46.7)  | 194 (38.7) |                               |                         |
|                         |          |           |                                                           | CA | 58 (34.3)  | 224 (44.7) | <b>0.027</b>                  | <b>0.64 (0.44–0.95)</b> |
|                         |          |           |                                                           | AA | 32 (18.9)  | 81 (16.2)  | 0.929                         | 0.98 (0.60–1.59)        |
|                         |          | rs11615   | Exon 3                                                    | CC | 87 (51.5)  | 288 (57.5) |                               |                         |
|                         |          |           |                                                           | CT | 66 (39.1)  | 182 (36.3) | 0.356                         | 1.19 (0.82–1.73)        |
|                         |          |           |                                                           | TT | 15 (8.9)   | 31 (6.2)   | 0.173                         | 1.58 (0.82–3.07)        |
|                         |          | rs3212955 | Intron 3                                                  | AA | 89 (52.7)  | 243 (48.5) |                               |                         |
|                         |          |           |                                                           | AG | 60 (35.5)  | 211 (42.1) | 0.217                         | 0.79 (0.54–1.15)        |
|                         |          |           |                                                           | GG | 20 (11.8)  | 47 (9.4)   | 0.583                         | 1.18 (0.66–2.10)        |
|                         |          | rs3212961 | Intron 3 immediately 3' to the exon 3                     | CC | 64 (37.9)  | 143 (28.5) |                               |                         |
|                         |          |           |                                                           | CA | 66 (39.1)  | 251 (50.1) | <b>0.012</b>                  | <b>0.60 (0.40–0.89)</b> |
|                         |          |           |                                                           | AA | 39 (23.1)  | 106 (21.2) | 0.422                         | 0.83 (0.51–1.32)        |
|                         |          | rs3212986 | 3'-UTR                                                    | GG | 78 (46.2)  | 226 (45.1) |                               |                         |
|                         |          |           |                                                           | GT | 69 (40.8)  | 211 (42.1) | 0.818                         | 0.96 (0.66–1.39)        |
|                         |          |           |                                                           | TT | 22 (13.0)  | 62 (12.4)  | 0.923                         | 1.03 (0.59–1.78)        |
|                         |          | rs735482  | 3'-UTR                                                    | CC | 35 (20.7)  | 96 (19.2)  |                               |                         |
|                         |          |           |                                                           | CA | 64 (37.9)  | 235 (46.9) | 0.227                         | 0.75 (0.46–1.20)        |
|                         |          |           |                                                           | AA | 70 (41.4)  | 168 (33.5) | 0.589                         | 1.14 (0.70–1.84)        |
| XPF(ERCC4)              | 16p13.12 | rs254942  | Intron 5                                                  | TT | 100 (59.2) | 294 (58.7) |                               |                         |
|                         |          |           |                                                           | TC | 58 (34.3)  | 173 (34.5) | 0.928                         | 0.98 (0.68–1.43)        |
|                         |          |           |                                                           | CC | 10 (5.9)   | 22 (4.4)   | 0.471                         | 1.34 (0.61–2.93)        |
|                         |          | rs1799801 | 3'-UTR                                                    | TT | 100 (59.2) | 309 (61.7) |                               |                         |
|                         |          |           |                                                           | TC | 65 (38.5)  | 166 (33.1) | 0.328                         | 1.20 (0.83–1.73)        |
|                         |          |           |                                                           | CC | 4 (2.4)    | 25 (5.0)   | 0.198                         | 0.49 (0.17–1.45)        |
|                         |          | rs2276464 | 3'-UTR                                                    | GG | 101 (59.8) | 310 (61.9) |                               |                         |
|                         |          |           |                                                           | GC | 64 (37.9)  | 165 (32.9) | 0.367                         | 1.18 (0.82–1.71)        |
|                         |          |           |                                                           | CC | 4 (2.4)    | 22 (4.4)   | 0.289                         | 0.56 (0.19–1.65)        |
| XPG(ERCC5)              | 13q33    | rs2094258 | Promoter                                                  | GG | 55 (32.5)  | 187 (37.3) |                               |                         |
|                         |          |           |                                                           | GA | 92 (54.4)  | 229 (45.7) | 0.116                         | 1.36 (0.93–2.01)        |
|                         |          |           |                                                           | AA | 22 (13.0)  | 75 (15.0)  | 0.965                         | 1.01 (0.58–1.78)        |
|                         |          | rs751402  | Promoter                                                  | CC | 70 (41.4)  | 232 (46.3) |                               |                         |
|                         |          |           |                                                           | CT | 81 (47.9)  | 185 (36.9) | 0.051                         | 1.45 (1.00–2.11)        |
|                         |          |           |                                                           | TT | 18 (10.7)  | 60 (12.0)  | 0.996                         | 1.00 (0.55–1.81)        |

|  |           |                |    |            |            |              |                         |
|--|-----------|----------------|----|------------|------------|--------------|-------------------------|
|  | rs2296147 | Promoter       | TT | 113 (66.9) | 319 (63.7) |              |                         |
|  |           |                | TC | 51 (30.2)  | 154 (30.7) | 0.717        | 0.93 (0.64–1.37)        |
|  |           |                | CC | 5 (3.0)    | 24 (4.8)   | 0.296        | 0.59 (0.22–1.59)        |
|  | rs1047768 | Exon 2         | TT | 91 (53.8)  | 254 (50.7) |              |                         |
|  |           |                | TC | 65 (38.5)  | 200 (39.9) | 0.618        | 0.91 (0.63–1.32)        |
|  |           |                | CC | 12 (7.1)   | 44 (8.8)   | 0.445        | 0.77 (0.39–1.52)        |
|  | rs4150291 | Intron 5       | AA | 15 (988.8) | 418 (83.4) |              |                         |
|  |           |                | AT | 19 (11.2)  | 77 (15.4)  | 0.168        | 0.69 (0.40–1.17)        |
|  |           |                | TT | 0 (0.0)    | 5 (1.0)    | NA           | NA                      |
|  | rs2228959 | Exon 8         | CC | 157 (92.9) | 453 (90.4) |              |                         |
|  |           |                | CA | 12 (7.1)   | 43 (8.6)   | 0.516        | 0.80 (0.41–1.56)        |
|  |           |                | AA | 0 (0.0)    | 4 (0.8)    | NA           | NA                      |
|  | rs4150383 | 3' near region | GG | 147 (87.0) | 433 (86.4) |              |                         |
|  |           |                | GA | 21 (12.4)  | 63 (12.6)  | 0.932        | 0.98 (0.58–1.66)        |
|  |           |                | AA | 1 (0.6)    | 2 (0.4)    | 0.765        | 1.44 (0.13–16.07)       |
|  | rs873601  | 3'-UTR         | GG | 54 (32.0)  | 142 (28.3) |              |                         |
|  |           |                | GA | 87 (51.5)  | 231 (46.1) | 0.966        | 0.99 (0.66–1.48)        |
|  |           |                | AA | 28 (16.6)  | 126 (25.1) | <b>0.041</b> | <b>0.58 (0.35–0.98)</b> |

Chr. Pos. = chromosomal position, meant the gene located in the chromosome.

Loc. = localisation, meant the SNP located in the relative location of the genes.

\*the sort order was according to the SNP location in its genes from 5' starting to 3' ends.

†P value was calculated by adjusted age and sex.

### Supplementary Table S3: Associations between genotype distributions of the positive *XPC* rs1870134 and clinicopathological parameters of hepatocellular cancer

| Parameters             | Genotype   |            | P-value | GC + CC vs GG    |
|------------------------|------------|------------|---------|------------------|
|                        | GC + CC    | GG         |         | OR (95% CI)      |
| <b>Differentiation</b> |            |            |         |                  |
| Well                   | 11 (27.5)  | 15 (23.4)  |         | 1                |
| Moderate               | 20 (50.0)  | 35 (54.7)  | 0.995   | 1.00 (0.31–3.25) |
| Poor                   | 9 (22.5)   | 14 (21.9)  | 0.821   | 0.89 (0.33–2.40) |
| <b>Smoking</b>         |            |            |         |                  |
| Ever Smoker            | 65 (33.3)  | 86 (30.6)  |         | 1                |
| Never Smoker           | 130 (66.7) | 195 (69.4) | 0.308   | 1.25 (0.82–1.90) |
| <b>Drinking</b>        |            |            |         |                  |
| Drinker                | 40 (20.5)  | 52 (18.5)  |         | 1                |
| Nondrinker             | 154 (79.0) | 229 (81.5) | 0.45    | 1.20 (0.75–1.94) |
| <b>Family history</b>  |            |            |         |                  |
| Yes                    | 25 (21.2)  | 42 (19.7)  |         | 1                |
| No                     | 93 (78.8)  | 171 (80.3) | 0.717   | 1.11 (0.63–1.94) |
| <b>HBV</b>             |            |            |         |                  |
| Positive               | 79 (73.1)  | 164 (81.2) |         | 1                |
| Negative               | 29 (26.9)  | 38 (18.8)  | 0.185   | 0.68 (0.39–1.20) |
| <b>HCV</b>             |            |            |         |                  |
| Positive               | 18 (29.0)  | 20 (21.1)  |         | 1                |
| Negative               | 44 (71.0)  | 75 (78.9)  | 0.295   | 1.49 (0.71–3.13) |

**Supplementary Table S4: Primers for realtime PCR reaction for gene expression detection**

| Amplified region        | Forward and Reverse primers (5'-3') | Amplicon size | Annealing temperature |
|-------------------------|-------------------------------------|---------------|-----------------------|
| XPC mRNA <sup>a</sup>   | F: TCCGAGATGTCACACAGAGG             | 102 bp        | 60°C                  |
|                         | R: TCTGGTATGGTCTCAAGGTCTC           |               |                       |
| GAPDH mRNA <sup>b</sup> | F: TGCACCACCAACTGCTTAG              | 176 bp        | 60°C                  |
|                         | R: GGATGCAGGGATGATGTTC              |               |                       |

<sup>a</sup>The primers used for XPC mRNA detection were according to Jana Slyskova et al [1].

<sup>b</sup>The primers used for GAPDH mRNA detection were according to Poulin H et al [2].

[1] Jana Slyskova et al, Differences in nucleotide excision repair capacity between newly diagnosed colorectal cancer patients and healthy controls. *Mutagenesis*. 2012; 27:225–232.

[2] Poulin H et al, Labelle Y: The PLAGL1 gene is down-regulated in human extraskeletal myxoid chondrosarcoma tumors. *Cancer Lett*. 2005; 227:185–191.
